# Supplementary material
Source: HighWire-hosted journal article supplement (https://bmjopen.bmj.com/content/9/3/e023578)
Supplement: inline-supplementary-material-1 [file inline-supplementary-material-1.pdf]

Supplementary File 1: Part worth utilities for the attributes and 95% confidence intervals, for the six scenarios, among the 430 respondents

| Attributes & Levels         | New Cold Scenario    |                        |                        | Blood in Stools Scenario |                        |                        | Sudden Pail Scenario |                        |                        | Anxiety Scenario     |                        |                        | Routine Check-up Scenario |                        |                        | Child/Family Member Sick Scenario |                        |                        |
|-----------------------------|----------------------|------------------------|------------------------|--------------------------|------------------------|------------------------|----------------------|------------------------|------------------------|----------------------|------------------------|------------------------|---------------------------|------------------------|------------------------|-----------------------------------|------------------------|------------------------|
|                             | Part-Worth Utilities | Lower Confidence Limit | Upper Confidence Limit | Part-Worth Utilities     | Lower Confidence Limit | Upper Confidence Limit | Part-Worth Utilities | Lower Confidence Limit | Upper Confidence Limit | Part-Worth Utilities | Lower Confidence Limit | Upper Confidence Limit | Part-Worth Utilities      | Lower Confidence Limit | Upper Confidence Limit | Part-Worth Utilities              | Lower Confidence Limit | Upper Confidence Limit |
| <b>1. Booking time</b>      |                      |                        |                        |                          |                        |                        |                      |                        |                        |                      |                        |                        |                           |                        |                        |                                   |                        |                        |
| a) Internet now             | -22.02               | -34.95                 | -9.09                  | -8.11                    | -18.85                 | 2.62                   | -12.74               | -24.51                 | -0.98                  | -11.91               | -25.11                 | 1.29                   | -16.32                    | -27.71                 | -4.92                  | -15.07                            | -25.14                 | -4.99                  |
| b) Phone 1 min              | 21.11                | 14.30                  | 27.92                  | 15.29                    | 9.03                   | 21.55                  | 14.97                | 7.75                   | 22.20                  | 9.79                 | 2.51                   | 17.06                  | 12.54                     | 5.73                   | 19.36                  | 13.14                             | 7.30                   | 18.98                  |
| c) Phone 1 - 10 min         | 0.91                 | -6.53                  | 8.35                   | -7.18                    | -13.40                 | -0.96                  | -2.23                | -9.25                  | 4.79                   | 2.12                 | -5.53                  | 9.78                   | 3.77                      | -3.73                  | 11.28                  | 1.93                              | -5.84                  | 9.69                   |
| <b>2. Days to appt.</b>     |                      |                        |                        |                          |                        |                        |                      |                        |                        |                      |                        |                        |                           |                        |                        |                                   |                        |                        |
| a) Same_day                 | 117.20               | 100.56                 | 133.83                 | 103.03                   | 86.27                  | 119.79                 | 119.05               | 101.40                 | 136.69                 | 80.17                | 66.07                  | 94.27                  | 37.58                     | 21.90                  | 53.26                  | 90.71                             | 71.84                  | 109.59                 |
| b) 1 - 14 days              | -0.59                | -11.19                 | 10.00                  | 13.35                    | 2.94                   | 23.76                  | 1.69                 | -9.35                  | 12.73                  | 22.39                | 12.81                  | 31.96                  | 13.73                     | 3.85                   | 23.62                  | 16.66                             | 4.80                   | 28.52                  |
| c) 14 days <                | -116.60              | -130.87                | -102.34                | -116.38                  | -129.81                | -102.95                | -120.74              | -133.83                | -107.65                | -102.56              | -114.72                | -90.39                 | -51.32                    | -64.98                 | -37.65                 | -107.38                           | -121.19                | -93.57                 |
| <b>3. Clinic wait</b>       |                      |                        |                        |                          |                        |                        |                      |                        |                        |                      |                        |                        |                           |                        |                        |                                   |                        |                        |
| a) < 15 min                 | 10.73                | 5.23                   | 16.24                  | 14.81                    | 10.43                  | 19.20                  | 11.71                | 6.08                   | 17.34                  | 10.39                | 3.66                   | 17.13                  | 10.01                     | 1.47                   | 18.55                  | 13.51                             | 8.23                   | 18.80                  |
| b) 15 - 30 min              | 12.70                | 8.93                   | 16.46                  | 11.20                    | 7.55                   | 14.86                  | 14.18                | 11.20                  | 17.16                  | 12.86                | 8.85                   | 16.87                  | 16.57                     | 11.76                  | 21.39                  | 7.41                              | 3.22                   | 11.61                  |
| c) 30 min plus              | -23.43               | -28.23                 | -18.63                 | -26.02                   | -30.27                 | -21.76                 | -25.89               | -30.96                 | -20.83                 | -23.26               | -28.92                 | -17.59                 | -26.58                    | -34.02                 | -19.15                 | -20.93                            | -27.80                 | -14.05                 |
| <b>4. Convenience</b>       |                      |                        |                        |                          |                        |                        |                      |                        |                        |                      |                        |                        |                           |                        |                        |                                   |                        |                        |
| a) Exact time I want        | 16.21                | 10.12                  | 22.29                  | 12.20                    | 6.54                   | 17.86                  | 14.03                | 8.66                   | 19.41                  | 16.09                | 10.33                  | 21.85                  | 21.91                     | 14.24                  | 29.57                  | 17.31                             | 11.20                  | 23.42                  |
| b) Not exact but OK         | 11.37                | 7.68                   | 15.06                  | 13.02                    | 9.74                   | 16.31                  | 10.38                | 7.26                   | 13.49                  | 13.05                | 8.77                   | 17.33                  | 10.51                     | 5.45                   | 15.58                  | 7.94                              | 2.64                   | 13.25                  |
| c) Not good time            | -27.58               | -34.43                 | -20.72                 | -25.22                   | -31.98                 | -18.47                 | -24.41               | -30.38                 | -18.44                 | -29.14               | -35.88                 | -22.41                 | -32.42                    | -41.10                 | -23.74                 | -25.25                            | -32.75                 | -17.75                 |
| <b>5. Familiarity</b>       |                      |                        |                        |                          |                        |                        |                      |                        |                        |                      |                        |                        |                           |                        |                        |                                   |                        |                        |
| a) Know well                | 24.21                | 16.96                  | 31.45                  | 40.37                    | 33.46                  | 47.29                  | 29.98                | 21.67                  | 38.29                  | 50.20                | 38.32                  | 62.08                  | 59.39                     | 48.03                  | 70.75                  | 49.69                             | 39.16                  | 60.23                  |
| b) Know not very well       | -3.74                | -8.99                  | 1.52                   | -11.65                   | -17.93                 | -5.36                  | -5.08                | -9.97                  | -0.18                  | -15.97               | -23.80                 | -8.14                  | -23.32                    | -30.92                 | -15.72                 | -16.67                            | -23.88                 | -9.45                  |
| c) Know not at all          | -20.47               | -25.75                 | -15.20                 | -28.73                   | -34.28                 | -23.17                 | -24.91               | -31.15                 | -18.66                 | -34.23               | -41.50                 | -26.97                 | -36.07                    | -43.04                 | -29.09                 | -33.03                            | -39.47                 | -26.59                 |
| <b>6. Provider position</b> |                      |                        |                        |                          |                        |                        |                      |                        |                        |                      |                        |                        |                           |                        |                        |                                   |                        |                        |
| a) Family doctor            | 35.50                | 25.76                  | 45.23                  | 39.17                    | 30.29                  | 48.05                  | 32.39                | 23.07                  | 41.70                  | 32.47                | 23.29                  | 41.65                  | 45.08                     | 32.90                  | 57.25                  | 37.51                             | 28.82                  | 46.20                  |
| b) Resident                 | 1.17                 | -5.61                  | 7.95                   | 2.19                     | -4.24                  | 8.61                   | 1.71                 | -5.91                  | 9.33                   | 12.01                | 4.00                   | 20.01                  | 9.74                      | 0.63                   | 18.85                  | 8.25                              | 1.09                   | 15.41                  |
| c) Nurse or NP              | -36.66               | -46.41                 | -26.92                 | -41.35                   | -50.71                 | -31.99                 | -34.10               | -43.39                 | -24.80                 | -44.48               | -54.40                 | -34.55                 | -54.82                    | -65.33                 | -44.31                 | -45.76                            | -56.03                 | -35.49                 |
| a) Opt-out                  | -21.65               | -49.07                 | 5.77                   | -19.85                   | -40.04                 | 0.33                   | -1.19                | -26.79                 | 24.42                  | -37.87               | -63.28                 | -12.45                 | -23.26                    | -57.40                 | 10.88                  | -13.63                            | -41.85                 | 14.58                  |
